# Supplementary material for: Consistency of global carbon budget between concentration- and emission-driven historical experiments simulated by CMIP6 Earth system models and suggestion for improved simulation of CO 2 concentration
Source: Copernicus journal article supplement (doi:10.5194/egusphere-2024-188), 2024-02-09
Supplement: Supplementary file 1 [file egusphere-2024-188-supplement.pdf]

# Supplementary Materials

Hajima et al. "Consistency of global carbon budget between concentration- and emission-driven historical experiments simulated by CMIP6 Earth system models and suggestion for improved simulation of CO2 concentration"

5

Table S1

- 10 The average (AVE), standard deviation (STD), min (MIN), and max (MAX) values of cumulative land and ocean carbon uptake of ensemble members simulated by MIROC-ES2L and UKESM-1-0-LL.

| Cumulative Land C Uptake  |                  |       |     |       |       |
|---------------------------|------------------|-------|-----|-------|-------|
| Model                     | Ensemble members | AVE   | STD | MAX   | MIN   |
| MIROC-ES2L                | 30               | 51.2  | 4.1 | 57.3  | 40.8  |
| UKESM-1-0-LL              | 12               | -10.3 | 4.1 | -5.2  | -18.1 |
|                           |                  |       |     |       |       |
| Cumulative Ocean C Uptake |                  |       |     |       |       |
| Model                     | Ensemble members | AVE   | STD | MAX   | MIN   |
| MIROC-ES2L                | 30               | 133.3 | 0.8 | 134.9 | 130.8 |
| UKESM-1-0-LL              | 12               | 135.5 | 1.4 | 138.7 | 133.2 |
|                           |                  |       |     |       |       |

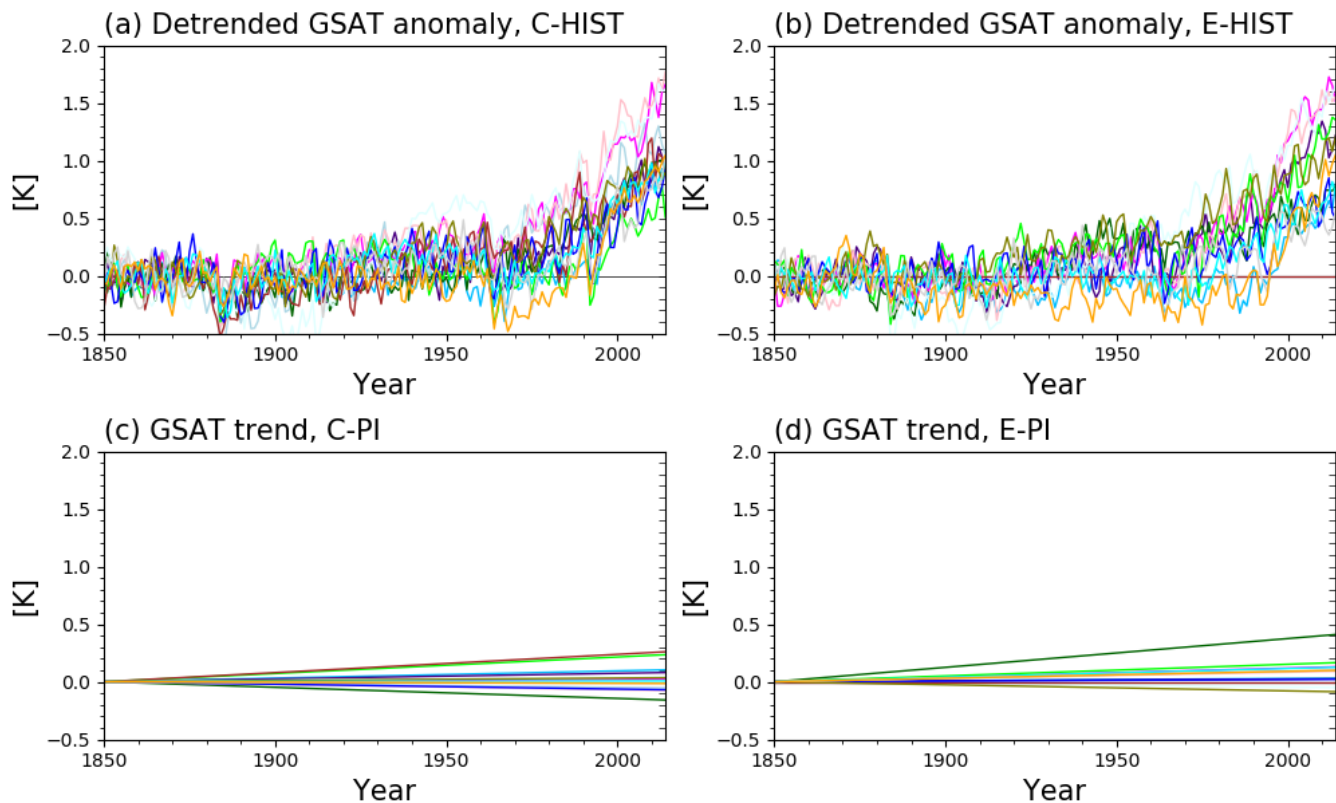

Figure S1. Global surface air temperature (GSAT) anomalies in (a) C-HIST and (b) E-HIST simulations. Panels (a) and (b) present GSAT anomalies corrected by the GSAT drift found in the control runs (C-PI and E-PI). The drifts were evaluated using linear regression lines and are presented in (c) and (d). Line color represents each model and the representation is the same as that in Figs. 4–7.

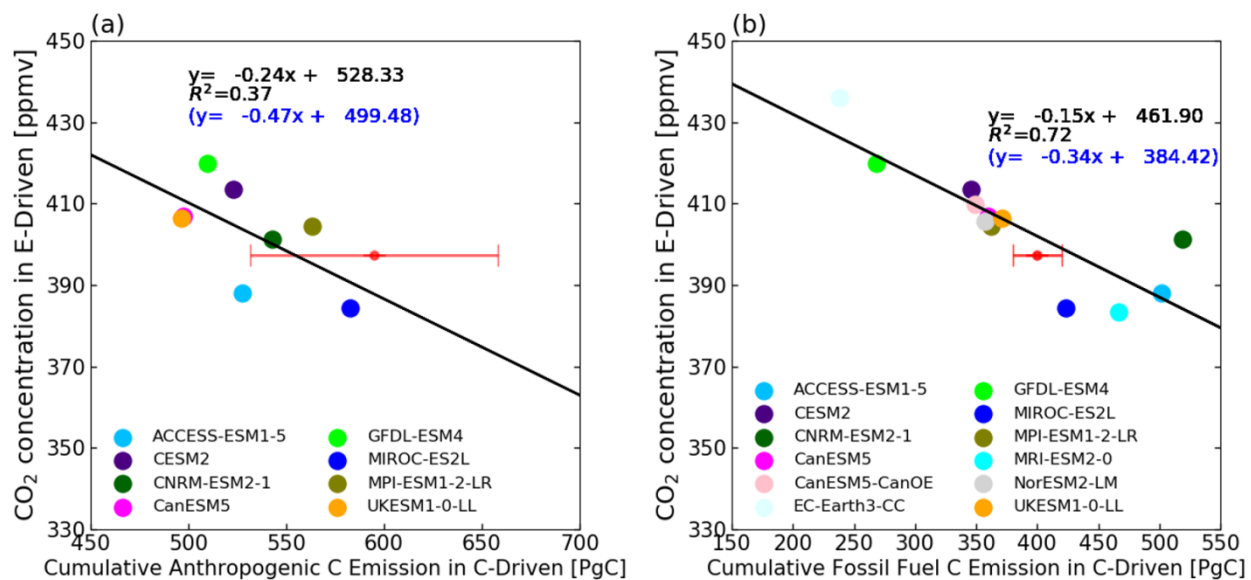

Figure S2. Same as Fig. 5 but the compatible fossil fuel emissions (x-axis) are not corrected by the imbalance terms.

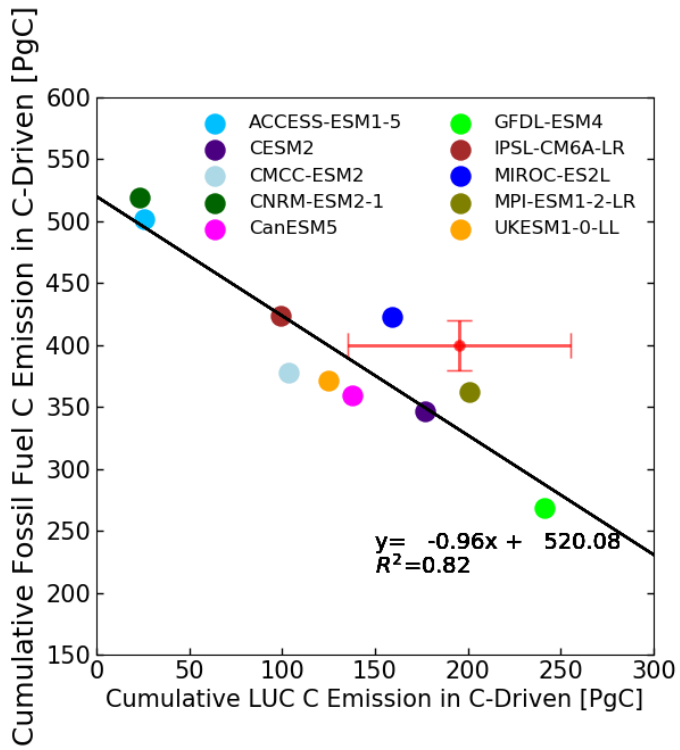

Figure S3. Same as Fig. 6 but the compatible fossil fuel emissions (y-axis) are not corrected by the imbalance terms.

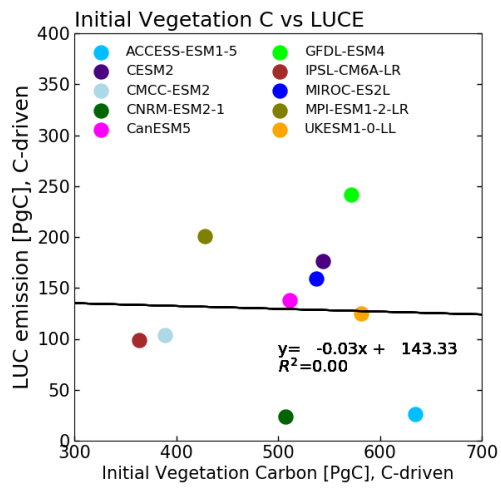

Figure S4. Comparison between initial vegetation carbon in C-HIST and cumulative land use change emission.
